# Supplementary material for: Epitope Discovery with Phylogenetic Hidden Markov Models
Source: PubMed Central journal article supplement — Mol Biol Evol. 2010 Jan 20;27(5):1212–20. doi: 10.1093/molbev/msq008 (PMC2857806; doi:10.1093/molbev/msq008), 2010-01-20
Supplement: msq008_3.pdf [file msq008_3.pdf]

**Table S1.** Anchor motifs and HLA genotypes and serotypes used to define known epitopes for each HLA allele.

| HLA allele | Anchor motif <sup>a</sup>  | HLA identifiers for which epitopes have been reported <sup>b</sup> |
|------------|----------------------------|--------------------------------------------------------------------|
| A*02       | X[LVQM]XXXXXXXXZZ[LV]      | A2, A02, A*0201, A*0202, A*0205, A*0206, A*0207, A*0214            |
| A*23       | X[IY]XXXXXXXXZZ[IW]        | A23, A*2301                                                        |
| A*29       | X[EM]XXXXXXXXZZ[YL]        | A29, A*2902                                                        |
| A*30       | X[YFVLMIT]XXXXXXXXZZ[LYFM] | A30, A*3002                                                        |
| A*3001     | X[YFVLMIT]XXXXXXXXZZ[LYFM] | A30                                                                |
| A*3002     | X[YFVL]XXXXXXXXZZ[Y]       | A30, A*3002                                                        |
| A*68       | X[TV]XXXXXXXXZZ[RKVL]      | A68, A*6802                                                        |
| A*6802     | X[TV]XXXXXXXXZZ[VL]        | A68, A*6802                                                        |
| A*0301     | X[LVMIAST]XXXXXXXXZZ[KYFR] | A3, A*0301                                                         |
| B*0702     | X[PV]XXXXXXXXZZ[LF]        | B7, B07, B*0702                                                    |
| B*0801     | XXZ[KR]XXXXXXXXZZ          | B8, B*0801                                                         |
| B*15       | X[QKH]XXXXXXXXZZ[YFL]      | B*15, B*1501, B*1503, B*1510                                       |
| B*1503     | X[QK]XXXXXXXXZZ[YF]        | B*15, B*1503                                                       |
| B*1510     | X[HQ]XXXXXXXXZZ[LF]        | B*15, B*1510                                                       |
| B*42       | X[P]XXXXXXXXZZ[L]          | B42, B*4201, B*4202                                                |
| B*4201     | X[P]XXXXXXXXZZ[L]          | B42, B*4201                                                        |
| B*44       | X[EMILDV]XXXXXXXXZZ[YF]    | B44, B*4402, B*4403, B*4415                                        |
| B*4403     | X[EMILDV]XXXXXXXXZZ[YF]    | B44, B*4403                                                        |
| B*57       | X[ATS]XXXXXXXXZZ[FWY]      | B57, B*5701, B*5702, B*5703                                        |
| B*5801     | X[ATS]XXXXXXXXZZ[FWY]      | B58, B*58, B*5801                                                  |
| B*5802     | X[ST]XXXZ[R]XXZ[F]         | B58, B*58, B*5802                                                  |
| B*81       | X[P]XXXXXXXXZZ[L]          | B81, B*8101                                                        |
| C*02       | X[A]XXXXXXXXZZ[L]          | Cw2                                                                |
| C*0202     | X[A]XXXXXXXXZZ[L]          | Cw2                                                                |
| C*04       | X[YFP]XXXXXXXXZZ[LFM]      | Cw4, Cw04                                                          |
| C*06       | XXXXXXXXZZ[LIVY]           | Cw*0602                                                            |
| C*0602     | XXXXXXXXZZ[LIVY]           | Cw*0602                                                            |
| C*07       | X[RHKYPQ]XXXXXXXXZZ[YFLWM] | Cw7, Cw*07                                                         |
| C*08       | X[A]XXXXXXXXZZ[LM]         | Cw8, Cw08, Cw*0802, Cw*0804                                        |
| C*17       | X[A]XXXXXXXXZZ[L]          | No documented epitopes                                             |
| C*1701     | X[A]XXXXXXXXZZ[L]          | No documented epitopes                                             |
| C*18       | X[RQ]XXXXXXXXZZ[LY]        | Cw18, Cw*1801                                                      |

<sup>a</sup> Amino acids in square brackets denote anchor residues, X denotes an indeterminate amino acid and Z denotes an optional, indeterminate amino acid which affects the final length of the epitope.

<sup>b</sup> These are the HLA alleles/serotypes consistent with the HLA allele shown in column one, for which experimentally determined epitopes have been reported in Yusim et al. (2009).
