# Supplementary material for: Epitope Discovery with Phylogenetic Hidden Markov Models
Source: PubMed Central journal article supplement — Mol Biol Evol. 2010 Jan 20;27(5):1212–20. doi: 10.1093/molbev/msq008 (PMC2857806; doi:10.1093/molbev/msq008), 2010-01-20
Supplement: msq008_4.pdf [file msq008_4.pdf]

**Table S2.** Number of known and total predictions for each HLA allele determined by employing anchor motifs only, the phylo-HMMwD and phylo-HMMwD+M. Predictions which overlapped with epitopes documented in Yusim et al. (2009) were regarded as known. Under all three methods, predicted epitopes were allowed to be between 8 and 11 amino acids in length, satisfying the anchor motifs given in supplementary table S3. Although flanking states were used to identify epitopes under the phylo-HMMwD+M, they were not considered as part of the predicted epitopes in order to ensure comparability between methods.

| HLA allele               | Anchors Only |            | Phylo-HMMwD |           | Phylo-HMMwD+M |           |
|--------------------------|--------------|------------|-------------|-----------|---------------|-----------|
|                          | Known        | Total      | Known       | Total     | Known         | Total     |
| A*02                     | 11           | 12         | 0           | 0         | 2             | 2         |
| A*23                     | 1            | 6          | 1           | 4         | 1             | 4         |
| A*29                     | 1            | 10         | 0           | 3         | 1             | 3         |
| A*30                     | 3            | 12         | 2           | 6         | 2             | 5         |
| A*3001                   | 3            | 12         | 1           | 3         | 1             | 3         |
| A*3002                   | 2            | 4          | 1           | 5         | 1             | 3         |
| A*68                     | 3            | 12         | 1           | 8         | 0             | 4         |
| A*6802                   | 3            | 10         | 1           | 8         | 0             | 3         |
| A*0301                   | 5            | 11         | 2           | 2         | 2             | 3         |
| B*0702                   | 5            | 12         | 0           | 0         | 1             | 3         |
| B*0801                   | 6            | 11         | 3           | 5         | 2             | 4         |
| B*15                     | 5            | 12         | 1           | 5         | 1             | 3         |
| B*1503                   | 2            | 3          | 0           | 1         | 0             | 1         |
| B*1510                   | 2            | 7          | 1           | 6         | 2             | 3         |
| B*42                     | 3            | 5          | 1           | 2         | 3             | 4         |
| B*4201                   | 3            | 5          | 1           | 2         | 3             | 4         |
| B*44                     | 3            | 8          | 2           | 3         | 1             | 2         |
| B*4403                   | 3            | 8          | 0           | 1         | 1             | 2         |
| B*57                     | 7            | 7          | 3           | 6         | 3             | 3         |
| B*5801                   | 6            | 7          | 1           | 1         | 3             | 3         |
| B*5802                   | 1            | 1          | 2           | 7         | 1             | 1         |
| B*81                     | 1            | 5          | 1           | 4         | 1             | 1         |
| C*02                     | 0            | 9          | 0           | 0         | 0             | 1         |
| C*0202                   | 0            | 9          | 0           | 0         | 0             | 2         |
| C*04                     | 1            | 13         | 2           | 10        | 1             | 5         |
| C*06                     | 1            | 3          | 0           | 5         | 0             | 6         |
| C*0602                   | 1            | 3          | 0           | 4         | 0             | 5         |
| C*07                     | 2            | 15         | 0           | 7         | 1             | 10        |
| C*08                     | 3            | 12         | 1           | 6         | 0             | 2         |
| C*17                     | 0            | 9          | 0           | 2         | 0             | 0         |
| C*1701                   | 0            | 9          | 0           | 4         | 0             | 0         |
| C*18                     | 2            | 13         | 1           | 5         | 0             | 6         |
| <b>Total<sup>a</sup></b> | <b>63</b>    | <b>191</b> | <b>21</b>   | <b>81</b> | <b>24</b>     | <b>65</b> |

<sup>a</sup> For HLA alleles reported at two- and four-digit resolution, only the number of predictions for the two-digit allele was used to calculate the totals. For HLA alleles with only a single anchor residue, that is HLA-B\*0801, HLA-C\*06 and HLA-C\*0602, the union of the predictions inferred with anchor motifs only encompassed nearly the entire genomic region under consideration. Consequently, these predictions were also excluded from the totals.
