# Supplementary material for: Epitope Discovery with Phylogenetic Hidden Markov Models
Source: PubMed Central journal article supplement — Mol Biol Evol. 2010 Jan 20;27(5):1212–20. doi: 10.1093/molbev/msq008 (PMC2857806; doi:10.1093/molbev/msq008), 2010-01-20
Supplement: msq008_5.pdf [file msq008_5.pdf]

**Table S3.** HLA alleles which co-occur more often than would be expected by chance based on Bonferroni-corrected Fisher's exact tests.

| HLA alleles |        | <i>p</i> -value        |
|-------------|--------|------------------------|
| B*5802      | C*0602 | $3.00 \times 10^{-70}$ |
| B*4201      | C*1701 | $5.74 \times 10^{-65}$ |
| B*1503      | C*0202 | $4.65 \times 10^{-40}$ |
| B*42        | C*17   | $1.14 \times 10^{-20}$ |
| A*3001      | C*1701 | $1.66 \times 10^{-15}$ |
| B*44        | C*04   | $1.98 \times 10^{-13}$ |
| A*0101      | B*8101 | $2.22 \times 10^{-13}$ |
| B*4501      | C*1601 | $1.28 \times 10^{-12}$ |
| A*3402      | B*44   | $1.07 \times 10^{-10}$ |
| A*3001      | B*4201 | $1.98 \times 10^{-10}$ |
| B*1510      | C*0304 | $7.85 \times 10^{-10}$ |
| B*18        | C*0704 | $1.19 \times 10^{-9}$  |
| B*1401      | C*0802 | $4.18 \times 10^{-9}$  |
| B*1401      | C*08   | $7.44 \times 10^{-9}$  |
| A*8001      | B*18   | $7.85 \times 10^{-9}$  |
| B*4403      | C*0401 | $8.34 \times 10^{-9}$  |
| A*3601      | B*5301 | $1.15 \times 10^{-8}$  |
| B*3910      | C*1203 | $1.17 \times 10^{-8}$  |
| B*1510      | C*0801 | $1.51 \times 10^{-8}$  |
| B*5801      | C*0302 | $2.51 \times 10^{-8}$  |
| A*0101      | C*18   | $5.96 \times 10^{-8}$  |
| B*8101      | C*18   | $6.58 \times 10^{-8}$  |
| A*6802      | B*1510 | $8.67 \times 10^{-8}$  |
| A*01        | C*1801 | $9.87 \times 10^{-8}$  |
| B*14        | C*0802 | $9.87 \times 10^{-8}$  |
| A*6802      | C*03   | $1.65 \times 10^{-7}$  |
| B*1510      | C*03   | $1.65 \times 10^{-7}$  |
| A*74        | C*0202 | $1.72 \times 10^{-7}$  |
| B*45        | C*1601 | $3.06 \times 10^{-7}$  |
| B*0801      | C*07   | $3.59 \times 10^{-7}$  |
| A*74        | B*1503 | $6.20 \times 10^{-7}$  |
| A*01        | B*81   | $6.49 \times 10^{-7}$  |
| B*8101      | C*1801 | $6.53 \times 10^{-7}$  |
| A*01        | B*8101 | $8.25 \times 10^{-7}$  |
| B*3910      | C*12   | $8.88 \times 10^{-7}$  |
| A*6601      | B*5802 | $9.29 \times 10^{-7}$  |
| A*6601      | C*0602 | $9.80 \times 10^{-7}$  |
| A*02        | C*08   | $1.20 \times 10^{-6}$  |
| A*3002      | C*1203 | $1.86 \times 10^{-6}$  |
| B*35        | C*0401 | $2.24 \times 10^{-6}$  |
| B*0702      | C*07   | $3.32 \times 10^{-6}$  |
| B*5301      | C*04   | $3.92 \times 10^{-6}$  |
| A*3402      | C*04   | $4.43 \times 10^{-6}$  |
| A*0202      | B*5703 | $4.81 \times 10^{-6}$  |
